# Supplementary material
Source: publisher site journal article supplement (https://www.spandidos-publications.com/6048/downloadSupplementary)
Supplement: Supplementary file 1 [file downloadSupplementary]

## Sheet: Mutagene
Table SII. Summary of mutations in the VHL and KDR genes in renal cell carcinoma retrieved from the Mutagene database.
Rank	Mutation	Type	Expected Mutability	Observed in WGS	Bscore	q-value	Driver Status Prediction
VHL
A. Mutations in the selected cancer cohort
1	p.Leu89His	Missense	3.74e-07	7	6.27e-31	5.83e-29	Driver
2	p.Ser111Asn	Missense	5.83e-07	5	9.15e-21	4.26e-19	Driver
3	p.Ser65*	Nonsense	9.91e-07	5	1.3e-19	3.02e-18	Driver
4	p.Ser68*	Nonsense	9.91e-07	5	1.3e-19	3.02e-18	Driver
5	p.Arg82Pro	Missense	2.22e-07	3	1.56e-13	2.61e-12	Driver
6	p.Val74Asp	Missense	2.28e-07	3	1.69e-13	2.61e-12	Driver
7	p.Leu128His	Missense	3.15e-07	3	4.42e-13	5.87e-12	Driver
8	p.Leu158Val	Missense	5.28e-07	3	2.09e-12	2.43e-11	Driver
9	p.Leu184Pro	Missense	6.45e-07	3	3.81e-12	3.45e-11	Driver
10	p.Glu189*	Nonsense	6.57e-07	3	4.02e-12	3.45e-11	Driver
11	p.Gln73*	Nonsense	6.6e-07	3	4.08e-12	3.45e-11	Driver
12	p.Gln96*	Nonsense	7.12e-07	3	5.12e-12	3.97e-11	Driver
13	p.Leu169Pro	Missense	9.43e-07	3	1.19e-11	8.53e-11	Driver
14	p.Trp88*	Nonsense	1.48e-06	3	4.57e-11	3.04e-10	Driver
15	p.Pro45Leu	Missense	1.81e-06	3	8.48e-11	5.26e-10	Driver
16	p.Arg79Pro	Missense	2.22e-07	2	4.79e-09	2.79e-08	Driver
17	p.Asn78Asp	Missense	3.11e-07	2	9.39e-09	5.14e-08	Driver
18	p.Leu153Pro	Missense	3.77e-07	2	1.38e-08	6.17e-08	Driver
19	p.Leu158Pro	Missense	3.77e-07	2	1.38e-08	6.17e-08	Driver
20	p.Leu188Pro	Missense	3.77e-07	2	1.38e-08	6.17e-08	Driver
21	p.Gly114Arg	Missense	3.79e-07	2	1.39e-08	6.17e-08	Driver
22	p.Leu135Phe	Missense	5.28e-07	2	2.7e-08	1.14e-07	Driver
23	p.Asp121Tyr	Missense	5.91e-07	2	3.38e-08	1.35e-07	Driver
24	p.Trp88Leu	Missense	6.04e-07	2	3.53e-08	1.35e-07	Driver
25	p.Gln145*	Nonsense	6.11e-07	2	3.62e-08	1.35e-07	Driver
26	p.Ile151Thr	Missense	6.35e-07	2	3.91e-08	1.4e-07	Driver
27	p.Ser111Arg	Missense	6.76e-07	2	4.43e-08	1.53e-07	Driver
28	p.Ser65Leu	Missense	1.52e-06	2	2.25e-07	7.47e-07	Driver
29	p.Gly39Ser	Missense	1.81e-06	2	3.19e-07	9.9e-07	Driver
30	p.Pro40Leu	Missense	1.81e-06	2	3.19e-07	9.9e-07	Driver
31	p.His110Pro	Missense	8.6e-08	1	3.8e-05	0.000114	Driver
32	p.Val74Gly	Missense	9.6e-08	1	4.24e-05	0.000123	Driver
33	p.Leu188Arg	Missense	1.12e-07	1	4.95e-05	0.000139	Driver
34	p.Thr133Pro	Missense	1.46e-07	1	6.44e-05	0.000176	Driver
35	p.Tyr112Asp	Missense	1.68e-07	1	7.42e-05	0.000197	Driver
36	p.Asn90Ile	Missense	2.07e-07	1	9.13e-05	0.000223	Potential driver
37	p.Val130Asp	Missense	2.07e-07	1	9.13e-05	0.000223	Potential driver
38	p.Val165Asp	Missense	2.07e-07	1	9.13e-05	0.000223	Potential driver
39	p.Ile151Asn	Missense	2.4e-07	1	0.000106	0.000252	Potential driver
40	p.Arg107Gly	Missense	2.47e-07	1	0.000109	0.000253	Potential driver
41	p.Asn78Tyr	Missense	2.55e-07	1	0.000113	0.000256	Potential driver
42	p.Lys159*	Nonsense	3.11e-07	1	0.000137	0.000281	Potential driver
43	p.Lys196*	Nonsense	3.11e-07	1	0.000137	0.000281	Potential driver
44	p.Val130Leu	Missense	3.26e-07	1	0.000144	0.000281	Potential driver
45	p.Gly93Val	Missense	3.39e-07	1	0.00015	0.000281	Potential driver
46	p.Ile151Phe	Missense	3.39e-07	1	0.00015	0.000281	Potential driver
47	p.Phe136Val	Missense	3.42e-07	1	0.000151	0.000281	Potential driver
48	p.Glu189Gln	Missense	3.57e-07	1	0.000157	0.000281	Potential driver
49	p.Ser168Cys	Missense	3.74e-07	1	0.000165	0.000281	Potential driver
50	p.Arg177*	Nonsense	3.74e-07	1	0.000165	0.000281	Potential driver
51	p.Arg120Gly	Missense	3.77e-07	1	0.000166	0.000281	Potential driver
52	p.Leu129Pro	Missense	3.77e-07	1	0.000166	0.000281	Potential driver
53	p.Ser65Trp	Missense	3.79e-07	1	0.000167	0.000281	Potential driver
54	p.Arg161Pro	Missense	3.79e-07	1	0.000167	0.000281	Potential driver
55	p.Glu41Gly	Missense	3.8e-07	1	0.000168	0.000281	Potential driver
56	p.Asn131Tyr	Missense	3.84e-07	1	0.000169	0.000281	Potential driver
57	p.Ser80Ile	Missense	3.94e-07	1	0.000174	0.000284	Potential driver
58	p.Cys162Phe	Missense	4.04e-07	1	0.000178	0.000285	Potential driver
59	p.Ser80Arg	Missense	4.37e-07	1	0.000193	0.000303	Potential driver
60	p.Trp117Cys	Missense	4.77e-07	1	0.00021	0.000326	Potential driver
61	p.Cys162Arg	Missense	5.28e-07	1	0.000233	0.000348	Potential driver
62	p.Tyr156*	Nonsense	5.28e-07	1	0.000233	0.000348	Potential driver
63	p.Val130Phe	Missense	5.35e-07	1	0.000236	0.000348	Potential driver
64	p.Glu160*	Nonsense	5.91e-07	1	0.00026	0.000378	Potential driver
65	p.Leu118Pro	Missense	6.45e-07	1	0.000284	0.000405	Potential driver
66	p.His110Tyr	Missense	6.6e-07	1	0.000291	0.000405	Potential driver
67	p.Asp28Gly	Missense	6.67e-07	1	0.000294	0.000405	Potential driver
68	p.Ser43Phe	Missense	6.94e-07	1	0.000306	0.000405	Potential driver
69	p.Cys162Tyr	Missense	7.12e-07	1	0.000314	0.000405	Potential driver
70	p.Gln195*	Nonsense	7.12e-07	1	0.000314	0.000405	Potential driver
71	p.Pro95Gln	Missense	7.12e-07	1	0.000314	0.000405	Potential driver
72	p.Pro45Ser	Missense	7.33e-07	1	0.000323	0.000405	Potential driver
73	p.Pro86Leu	Missense	7.33e-07	1	0.000323	0.000405	Potential driver
74	p.His115Asn	Missense	7.41e-07	1	0.000327	0.000405	Potential driver
75	p.Glu173*	Nonsense	7.41e-07	1	0.000327	0.000405	Potential driver
76	p.Asn78Ser	Missense	7.58e-07	1	0.000334	0.000409	Potential driver
77	p.Trp88Arg	Missense	7.91e-07	1	0.000349	0.000421	Potential driver
78	p.Tyr175*	Nonsense	8.44e-07	1	0.000372	0.000439	Potential driver
79	p.His115Tyr	Missense	8.45e-07	1	0.000373	0.000439	Potential driver
80	p.Tyr112*	Nonsense	8.61e-07	1	0.00038	0.000441	Potential driver
81	p.Glu70*	Nonsense	9.91e-07	1	0.000437	0.00049	Potential driver
82	p.Glu94*	Nonsense	9.91e-07	1	0.000437	0.00049	Potential driver
83	p.Glu186*	Nonsense	9.91e-07	1	0.000437	0.00049	Potential driver
84	p.Leu116=	Silent	1.33e-06	1	0.000587	0.00065	Potential driver
85	p.Trp117*	Nonsense	1.48e-06	1	0.000651	0.000712	Potential driver
86	p.Pro71=	Silent	1.5e-06	1	0.00066	0.000714	Potential driver
87	p.Ser72=	Silent	1.67e-06	1	0.000735	0.000785	Potential driver
88	p.Arg161*	Nonsense	1.75e-06	1	0.00077	0.000814	Potential driver
89	p.Arg167Gln	Missense	1.81e-06	1	0.0008	0.000836	Potential driver
90	p.Val74=	Silent	1.9e-06	1	0.000838	0.000866	Potential driver
91	p.Leu129=	Silent	1.99e-06	1	0.000878	0.000888	Potential driver
92	p.Leu188=	Silent	1.99e-06	1	0.000878	0.000888	Potential driver
93	p.Leu158=	Silent	2.43e-06	1	0.00107	0.00107	Potential driver
B. All genome wide-studies in ICGC
Rank	Mutation	Type	Expected Mutability	Observed in WGS	Bscore	q-value	Driver Status Prediction
1	p.Leu89His	Missense	3.74e-07	7	1.36e-21	1.7e-19	Driver
2	p.Ser111Asn	Missense	5.83e-07	5	4.21e-14	2.63e-12	Driver
3	p.Ser68*	Nonsense	9.91e-07	5	5.96e-13	1.86e-11	Driver
4	p.Ser65*	Nonsense	9.91e-07	5	5.96e-13	1.86e-11	Driver
5	p.Leu158Val	Missense	5.28e-07	4	2.58e-11	6.44e-10	Driver
6	p.Arg82Pro	Missense	2.22e-07	3	1.54e-09	2.6e-08	Driver
7	p.Trp88*	Nonsense	1.48e-06	4	1.56e-09	2.6e-08	Driver
8	p.Val74Asp	Missense	2.28e-07	3	1.67e-09	2.6e-08	Driver
9	p.Leu128His	Missense	3.15e-07	3	4.37e-09	6.07e-08	Driver
10	p.Asp121Tyr	Missense	5.91e-07	3	2.88e-08	3.61e-07	Driver
11	p.Leu184Pro	Missense	6.45e-07	3	3.76e-08	3.87e-07	Driver
12	p.Glu189*	Nonsense	6.57e-07	3	3.97e-08	3.87e-07	Driver
13	p.Gln73*	Nonsense	6.6e-07	3	4.03e-08	3.87e-07	Driver
14	p.Gln96*	Nonsense	7.12e-07	3	5.04e-08	4.5e-07	Driver
15	p.Leu169Pro	Missense	9.43e-07	3	1.17e-07	9.77e-07	Driver
16	p.Arg161*	Nonsense	1.75e-06	3	7.4e-07	5.78e-06	Driver
17	p.Pro45Leu	Missense	1.81e-06	3	8.29e-07	6.1e-06	Driver
18	p.Arg79Pro	Missense	2.22e-07	2	2.2e-06	1.53e-05	Driver
19	p.Ile151Ser	Missense	2.75e-07	2	3.37e-06	2.22e-05	Driver
20	p.Asn78Asp	Missense	3.11e-07	2	4.31e-06	2.7e-05	Driver
21	p.Arg177*	Nonsense	3.74e-07	2	6.23e-06	3.2e-05	Driver
22	p.Leu188Pro	Missense	3.77e-07	2	6.32e-06	3.2e-05	Driver
23	p.Leu158Pro	Missense	3.77e-07	2	6.32e-06	3.2e-05	Driver
24	p.Leu153Pro	Missense	3.77e-07	2	6.32e-06	3.2e-05	Driver
25	p.Gly114Arg	Missense	3.79e-07	2	6.4e-06	3.2e-05	Driver
26	p.Leu135Phe	Missense	5.28e-07	2	1.24e-05	5.96e-05	Driver
27	p.Glu160*	Nonsense	5.91e-07	2	1.55e-05	7.15e-05	Driver
28	p.Trp88Leu	Missense	6.04e-07	2	1.62e-05	7.15e-05	Driver
29	p.Gln145*	Nonsense	6.11e-07	2	1.66e-05	7.15e-05	Driver
30	p.Ile151Thr	Missense	6.35e-07	2	1.79e-05	7.46e-05	Driver
31	p.Ser111Arg	Missense	6.76e-07	2	2.03e-05	8.19e-05	Driver
32	p.Gln195*	Nonsense	7.12e-07	2	2.25e-05	8.53e-05	Driver
33	p.Cys162Tyr	Missense	7.12e-07	2	2.25e-05	8.53e-05	Driver
34	p.Glu94*	Nonsense	9.91e-07	2	4.36e-05	0.00016	Driver
35	p.Ser65Leu	Missense	1.52e-06	2	0.000102	0.000366	Potential driver
36	p.Pro40Leu	Missense	1.81e-06	2	0.000145	0.000491	Potential driver
37	p.Gly39Ser	Missense	1.81e-06	2	0.000145	0.000491	Potential driver
38	p.Arg210=	Silent	2.26e-06	2	0.000225	0.00074	Potential driver
39	p.His110Pro	Missense	8.6e-08	1	0.000814	0.00261	Potential driver
40	p.Val74Gly	Missense	9.6e-08	1	0.000909	0.00284	Potential driver
41	p.Leu188Arg	Missense	1.12e-07	1	0.00106	0.00323	Potential driver
42	p.Thr133Pro	Missense	1.46e-07	1	0.00138	0.0041	Potential driver
43	p.Tyr112Asp	Missense	1.68e-07	1	0.00159	0.00462	Potential driver
44	p.Val165Asp	Missense	2.07e-07	1	0.00196	0.00531	Potential driver
45	p.Val130Asp	Missense	2.07e-07	1	0.00196	0.00531	Potential driver
46	p.Asn90Ile	Missense	2.07e-07	1	0.00196	0.00531	Potential driver
47	p.Ile151Asn	Missense	2.4e-07	1	0.00226	0.00595	Potential driver
48	p.Arg167Gly	Missense	2.47e-07	1	0.00233	0.00595	Potential driver
49	p.Arg107Gly	Missense	2.47e-07	1	0.00233	0.00595	Potential driver
50	p.Asn78Tyr	Missense	2.55e-07	1	0.00241	0.00603	Potential driver
51	p.Phe136Tyr	Missense	3.09e-07	1	0.00291	0.00665	Potential driver
52	p.Lys196*	Nonsense	3.11e-07	1	0.00294	0.00665	Potential driver
53	p.Lys159*	Nonsense	3.11e-07	1	0.00294	0.00665	Potential driver
54	p.Glu173Gln	Missense	3.14e-07	1	0.00297	0.00665	Potential driver
55	p.Val130Leu	Missense	3.26e-07	1	0.00308	0.00665	Potential driver
56	p.Gly93Val	Missense	3.39e-07	1	0.0032	0.00665	Potential driver
57	p.Ile151Phe	Missense	3.39e-07	1	0.0032	0.00665	Potential driver
58	p.Phe136Val	Missense	3.42e-07	1	0.00323	0.00665	Potential driver
59	p.Glu189Gln	Missense	3.57e-07	1	0.00337	0.00665	Potential driver
60	p.Ser168Cys	Missense	3.74e-07	1	0.00353	0.00665	Passenger
61	p.Leu178Pro	Missense	3.77e-07	1	0.00355	0.00665	Passenger
62	p.Leu129Pro	Missense	3.77e-07	1	0.00355	0.00665	Passenger
63	p.Arg120Gly	Missense	3.77e-07	1	0.00355	0.00665	Passenger
64	p.Arg161Pro	Missense	3.79e-07	1	0.00357	0.00665	Passenger
65	p.Arg79Gly	Missense	3.79e-07	1	0.00357	0.00665	Passenger
66	p.Ser65Trp	Missense	3.79e-07	1	0.00357	0.00665	Passenger
67	p.Glu41Gly	Missense	3.8e-07	1	0.00359	0.00665	Passenger
68	p.Asn131Tyr	Missense	3.84e-07	1	0.00362	0.00665	Passenger
69	p.Ser80Ile	Missense	3.94e-07	1	0.00372	0.00673	Passenger
70	p.Cys162Phe	Missense	4.04e-07	1	0.00381	0.0068	Passenger
71	p.Ser80Arg	Missense	4.37e-07	1	0.00412	0.00725	Passenger
72	p.Trp117Cys	Missense	4.77e-07	1	0.0045	0.00781	Passenger
73	p.Cys162Arg	Missense	5.28e-07	1	0.00497	0.00817	Passenger
74	p.Tyr156*	Nonsense	5.28e-07	1	0.00498	0.00817	Passenger
75	p.Asn150Lys	Missense	5.28e-07	1	0.00498	0.00817	Passenger
76	p.Glu42Gln	Missense	5.28e-07	1	0.00498	0.00817	Passenger
77	p.Val130Phe	Missense	5.35e-07	1	0.00504	0.00817	Passenger
78	p.Thr124Lys	Missense	5.41e-07	1	0.0051	0.00817	Passenger
79	p.Tyr112=	Silent	5.83e-07	1	0.00549	0.00869	Passenger
80	p.Asp190Tyr	Missense	5.91e-07	1	0.00557	0.0087	Passenger
81	p.Gly212*	Nonsense	6.35e-07	1	0.00598	0.00902	Passenger
82	p.Gly127Val	Missense	6.35e-07	1	0.00598	0.00902	Passenger
83	p.Leu118Pro	Missense	6.45e-07	1	0.00608	0.00902	Passenger
84	p.Gln164*	Nonsense	6.6e-07	1	0.00622	0.00902	Passenger
85	p.Gln132*	Nonsense	6.6e-07	1	0.00622	0.00902	Passenger
86	p.His110Tyr	Missense	6.6e-07	1	0.00622	0.00902	Passenger
87	p.Asp28Gly	Missense	6.67e-07	1	0.00628	0.00902	Passenger
88	p.Gly144Glu	Missense	6.94e-07	1	0.00653	0.00908	Passenger
89	p.Glu52Lys	Missense	6.94e-07	1	0.00653	0.00908	Passenger
90	p.Ser43Phe	Missense	6.94e-07	1	0.00653	0.00908	Passenger
91	p.Pro95Gln	Missense	7.12e-07	1	0.00671	0.00913	Passenger
92	p.Pro86Leu	Missense	7.33e-07	1	0.00691	0.00913	Passenger
93	p.Pro45Ser	Missense	7.33e-07	1	0.00691	0.00913	Passenger
94	p.Glu173*	Nonsense	7.41e-07	1	0.00698	0.00913	Passenger
95	p.His115Asn	Missense	7.41e-07	1	0.00698	0.00913	Passenger
96	p.Ala122=	Silent	7.44e-07	1	0.00701	0.00913	Passenger
97	p.Asn78Ser	Missense	7.58e-07	1	0.00714	0.0092	Passenger
98	p.Trp88Arg	Missense	7.91e-07	1	0.00744	0.0095	Passenger
99	p.Asp9Glu	Missense	8.09e-07	1	0.00761	0.00961	Passenger
100	p.Ile147=	Silent	8.29e-07	1	0.0078	0.00975	Passenger
101	p.Tyr175*	Nonsense	8.44e-07	1	0.00794	0.00975	Passenger
102	p.His115Tyr	Missense	8.45e-07	1	0.00796	0.00975	Passenger
103	p.Tyr112*	Nonsense	8.61e-07	1	0.0081	0.00983	Passenger
104	p.Glu186*	Nonsense	9.91e-07	1	0.00932	0.0111	Passenger
105	p.Glu70*	Nonsense	9.91e-07	1	0.00932	0.0111	Passenger
106	p.Ile147Val	Missense	1.03e-06	1	0.00968	0.0114	Passenger
107	p.Arg205=	Silent	1.27e-06	1	0.0119	0.0137	Passenger
108	p.Val194=	Silent	1.27e-06	1	0.0119	0.0137	Passenger
109	p.Met1Ile	Missense	1.27e-06	1	0.0119	0.0137	Passenger
110	p.Leu116=	Silent	1.33e-06	1	0.0125	0.0142	Passenger
111	p.Trp117*	Nonsense	1.48e-06	1	0.0139	0.0156	Passenger
112	p.Pro71=	Silent	1.5e-06	1	0.0141	0.0157	Passenger
113	p.Ser72=	Silent	1.67e-06	1	0.0156	0.0173	Passenger
114	p.Arg167Trp	Missense	1.81e-06	1	0.017	0.0183	Passenger
115	p.Arg167Gln	Missense	1.81e-06	1	0.017	0.0183	Passenger
116	p.Arg113*	Nonsense	1.81e-06	1	0.017	0.0183	Passenger
117	p.Leu85=	Silent	1.85e-06	1	0.0174	0.0185	Passenger
118	p.Val74=	Silent	1.9e-06	1	0.0178	0.0189	Passenger
119	p.Leu188=	Silent	1.99e-06	1	0.0187	0.0194	Passenger
120	p.Leu129=	Silent	1.99e-06	1	0.0187	0.0194	Passenger
121	p.Gly144Arg	Missense	2.06e-06	1	0.0193	0.0199	Passenger
122	p.Leu158=	Silent	2.43e-06	1	0.0227	0.0233	Passenger
123	p.Ile180=	Silent	2.51e-06	1	0.0235	0.0238	Passenger
124	p.Ser183=	Silent	2.52e-06	1	0.0236	0.0238	Passenger
125	p.Tyr185=	Silent	2.64e-06	1	0.0246	0.0246	Passenger
C. All samples in COSMIC
1	p.Leu89His	Missense	3.74e-07	7	1.36e-21	2.13e-19	Driver
2	p.Ser111Asn	Missense	5.83e-07	5	4.21e-14	3.3e-12	Driver
3	p.Ser65*	Nonsense	9.91e-07	5	5.96e-13	2.34e-11	Driver
4	p.Ser68*	Nonsense	9.91e-07	5	5.96e-13	2.34e-11	Driver
5	p.Leu158Val	Missense	5.28e-07	4	2.58e-11	8.09e-10	Driver
6	p.Arg82Pro	Missense	2.22e-07	3	1.54e-09	3.27e-08	Driver
7	p.Trp88*	Nonsense	1.48e-06	4	1.56e-09	3.27e-08	Driver
8	p.Val74Asp	Missense	2.28e-07	3	1.67e-09	3.27e-08	Driver
9	p.Leu128His	Missense	3.15e-07	3	4.37e-09	7.62e-08	Driver
10	p.Asp121Tyr	Missense	5.91e-07	3	2.88e-08	4.53e-07	Driver
11	p.Leu184Pro	Missense	6.45e-07	3	3.76e-08	4.86e-07	Driver
12	p.Glu189*	Nonsense	6.57e-07	3	3.97e-08	4.86e-07	Driver
13	p.Gln73*	Nonsense	6.6e-07	3	4.03e-08	4.86e-07	Driver
14	p.Gln96*	Nonsense	7.12e-07	3	5.04e-08	5.66e-07	Driver
15	p.Leu169Pro	Missense	9.43e-07	3	1.17e-07	1.23e-06	Driver
16	p.Arg161*	Nonsense	1.75e-06	3	7.4e-07	7.26e-06	Driver
17	p.Pro45Leu	Missense	1.81e-06	3	8.29e-07	7.66e-06	Driver
18	p.Arg79Pro	Missense	2.22e-07	2	2.2e-06	1.92e-05	Driver
19	p.Ile151Ser	Missense	2.75e-07	2	3.37e-06	2.79e-05	Driver
20	p.Asn78Asp	Missense	3.11e-07	2	4.31e-06	3.39e-05	Driver
21	p.Arg177*	Nonsense	3.74e-07	2	6.23e-06	4.02e-05	Driver
22	p.Leu153Pro	Missense	3.77e-07	2	6.32e-06	4.02e-05	Driver
23	p.Leu158Pro	Missense	3.77e-07	2	6.32e-06	4.02e-05	Driver
24	p.Leu188Pro	Missense	3.77e-07	2	6.32e-06	4.02e-05	Driver
25	p.Gly114Arg	Missense	3.79e-07	2	6.4e-06	4.02e-05	Driver
26	p.Leu135Phe	Missense	5.28e-07	2	1.24e-05	7.49e-05	Driver
27	p.Glu160*	Nonsense	5.91e-07	2	1.55e-05	8.98e-05	Driver
28	p.Trp88Leu	Missense	6.04e-07	2	1.62e-05	8.98e-05	Driver
29	p.Gln145*	Nonsense	6.11e-07	2	1.66e-05	8.98e-05	Driver
30	p.Ile151Thr	Missense	6.35e-07	2	1.79e-05	9.37e-05	Driver
31	p.Ser111Arg	Missense	6.76e-07	2	2.03e-05	0.000103	Driver
32	p.Cys162Tyr	Missense	7.12e-07	2	2.25e-05	0.000107	Driver
33	p.Gln195*	Nonsense	7.12e-07	2	2.25e-05	0.000107	Driver
34	p.Glu94*	Nonsense	9.91e-07	2	4.36e-05	0.000201	Driver
35	p.Ser65Leu	Missense	1.52e-06	2	0.000102	0.00046	Potential driver
36	p.Gly39Ser	Missense	1.81e-06	2	0.000145	0.000617	Potential driver
37	p.Pro40Leu	Missense	1.81e-06	2	0.000145	0.000617	Potential driver
38	p.Arg210=	Silent	2.26e-06	2	0.000225	0.000929	Potential driver
39	p.His110Pro	Missense	8.6e-08	1	0.000814	0.00327	Potential driver
40	p.Val74Gly	Missense	9.6e-08	1	0.000909	0.00357	Potential driver
41	p.Leu188Arg	Missense	1.12e-07	1	0.00106	0.00406	Potential driver
42	p.Thr133Pro	Missense	1.46e-07	1	0.00138	0.00515	Potential driver
43	p.Tyr112Asp	Missense	1.68e-07	1	0.00159	0.0058	Potential driver
44	p.Asn90Ile	Missense	2.07e-07	1	0.00196	0.00667	Potential driver
45	p.Val130Asp	Missense	2.07e-07	1	0.00196	0.00667	Potential driver
46	p.Val165Asp	Missense	2.07e-07	1	0.00196	0.00667	Potential driver
47	p.Ile151Asn	Missense	2.4e-07	1	0.00226	0.00747	Potential driver
48	p.Arg107Gly	Missense	2.47e-07	1	0.00233	0.00747	Potential driver
49	p.Arg167Gly	Missense	2.47e-07	1	0.00233	0.00747	Potential driver
50	p.Asn78Tyr	Missense	2.55e-07	1	0.00241	0.00757	Potential driver
51	p.Phe136Tyr	Missense	3.09e-07	1	0.00291	0.00835	Potential driver
52	p.Lys159*	Nonsense	3.11e-07	1	0.00294	0.00835	Potential driver
53	p.Lys196*	Nonsense	3.11e-07	1	0.00294	0.00835	Potential driver
54	p.Glu173Gln	Missense	3.14e-07	1	0.00297	0.00835	Potential driver
55	p.Val130Leu	Missense	3.26e-07	1	0.00308	0.00835	Potential driver
56	p.Gly93Val	Missense	3.39e-07	1	0.0032	0.00835	Potential driver
57	p.Ile151Phe	Missense	3.39e-07	1	0.0032	0.00835	Potential driver
58	p.Phe136Val	Missense	3.42e-07	1	0.00323	0.00835	Potential driver
59	p.Glu189Gln	Missense	3.57e-07	1	0.00337	0.00835	Potential driver
60	p.Ser168Cys	Missense	3.74e-07	1	0.00353	0.00835	Passenger
61	p.Arg120Gly	Missense	3.77e-07	1	0.00355	0.00835	Passenger
62	p.Leu129Pro	Missense	3.77e-07	1	0.00355	0.00835	Passenger
63	p.Leu178Pro	Missense	3.77e-07	1	0.00355	0.00835	Passenger
64	p.Ser65Trp	Missense	3.79e-07	1	0.00357	0.00835	Passenger
65	p.Arg79Gly	Missense	3.79e-07	1	0.00357	0.00835	Passenger
66	p.Arg161Pro	Missense	3.79e-07	1	0.00357	0.00835	Passenger
67	p.Glu41Gly	Missense	3.8e-07	1	0.00359	0.00835	Passenger
68	p.Asn131Tyr	Missense	3.84e-07	1	0.00362	0.00835	Passenger
69	p.Ser80Ile	Missense	3.94e-07	1	0.00372	0.00846	Passenger
70	p.Cys162Phe	Missense	4.04e-07	1	0.00381	0.00854	Passenger
71	p.Ser80Arg	Missense	4.37e-07	1	0.00412	0.0091	Passenger
72	p.Trp117Cys	Missense	4.77e-07	1	0.0045	0.00981	Passenger
73	p.Cys162Arg	Missense	5.28e-07	1	0.00497	0.0103	Passenger
74	p.Asn150Lys	Missense	5.28e-07	1	0.00498	0.0103	Passenger
75	p.Tyr156*	Nonsense	5.28e-07	1	0.00498	0.0103	Passenger
76	p.Glu42Gln	Missense	5.28e-07	1	0.00498	0.0103	Passenger
77	p.Val130Phe	Missense	5.35e-07	1	0.00504	0.0103	Passenger
78	p.Thr124Lys	Missense	5.41e-07	1	0.0051	0.0103	Passenger
79	p.Tyr112=	Silent	5.83e-07	1	0.00549	0.0109	Passenger
80	p.Asp190Tyr	Missense	5.91e-07	1	0.00557	0.0109	Passenger
81	p.Gly127Val	Missense	6.35e-07	1	0.00598	0.0113	Passenger
82	p.Gly212*	Nonsense	6.35e-07	1	0.00598	0.0113	Passenger
83	p.Leu118Pro	Missense	6.45e-07	1	0.00608	0.0113	Passenger
84	p.His110Tyr	Missense	6.6e-07	1	0.00622	0.0113	Passenger
85	p.Gln132*	Nonsense	6.6e-07	1	0.00622	0.0113	Passenger
86	p.Gln164*	Nonsense	6.6e-07	1	0.00622	0.0113	Passenger
87	p.Asp28Gly	Missense	6.67e-07	1	0.00628	0.0113	Passenger
88	p.Ser43Phe	Missense	6.94e-07	1	0.00653	0.0114	Passenger
89	p.Glu52Lys	Missense	6.94e-07	1	0.00653	0.0114	Passenger
90	p.Gly144Glu	Missense	6.94e-07	1	0.00653	0.0114	Passenger
91	p.Pro95Gln	Missense	7.12e-07	1	0.00671	0.0115	Passenger
92	p.Pro45Ser	Missense	7.33e-07	1	0.00691	0.0115	Passenger
93	p.Pro86Leu	Missense	7.33e-07	1	0.00691	0.0115	Passenger
94	p.His115Asn	Missense	7.41e-07	1	0.00698	0.0115	Passenger
95	p.Glu173*	Nonsense	7.41e-07	1	0.00698	0.0115	Passenger
96	p.Ala122=	Silent	7.44e-07	1	0.00701	0.0115	Passenger
97	p.Asn78Ser	Missense	7.58e-07	1	0.00714	0.0116	Passenger
98	p.Trp88Arg	Missense	7.91e-07	1	0.00744	0.0119	Passenger
99	p.Asp9Glu	Missense	8.09e-07	1	0.00761	0.0121	Passenger
100	p.Ile147=	Silent	8.29e-07	1	0.0078	0.0122	Passenger
101	p.Tyr175*	Nonsense	8.44e-07	1	0.00794	0.0122	Passenger
102	p.His115Tyr	Missense	8.45e-07	1	0.00796	0.0122	Passenger
103	p.Tyr112*	Nonsense	8.61e-07	1	0.0081	0.0123	Passenger
104	p.Glu70*	Nonsense	9.91e-07	1	0.00932	0.0139	Passenger
105	p.Glu186*	Nonsense	9.91e-07	1	0.00932	0.0139	Passenger
106	p.Ile147Val	Missense	1.03e-06	1	0.00968	0.0143	Passenger
107	p.Met1Ile	Missense	1.27e-06	1	0.0119	0.0172	Passenger
108	p.Val194=	Silent	1.27e-06	1	0.0119	0.0172	Passenger
109	p.Arg205=	Silent	1.27e-06	1	0.0119	0.0172	Passenger
110	p.Leu116=	Silent	1.33e-06	1	0.0125	0.0179	Passenger
111	p.Trp117*	Nonsense	1.48e-06	1	0.0139	0.0196	Passenger
112	p.Pro71=	Silent	1.5e-06	1	0.0141	0.0197	Passenger
113	p.Ser72=	Silent	1.67e-06	1	0.0156	0.0217	Passenger
114	p.Arg113*	Nonsense	1.81e-06	1	0.017	0.023	Passenger
115	p.Arg167Gln	Missense	1.81e-06	1	0.017	0.023	Passenger
116	p.Arg167Trp	Missense	1.81e-06	1	0.017	0.023	Passenger
117	p.Leu85=	Silent	1.85e-06	1	0.0174	0.0233	Passenger
118	p.Val74=	Silent	1.9e-06	1	0.0178	0.0237	Passenger
119	p.Leu129=	Silent	1.99e-06	1	0.0187	0.0244	Passenger
120	p.Leu188=	Silent	1.99e-06	1	0.0187	0.0244	Passenger
121	p.Gly144Arg	Missense	2.06e-06	1	0.0193	0.025	Passenger
122	p.Leu158=	Silent	2.43e-06	1	0.0227	0.0292	Passenger
123	p.Ile180=	Silent	2.51e-06	1	0.0235	0.0298	Passenger
124	p.Ser183=	Silent	2.52e-06	1	0.0236	0.0298	Passenger
125	p.Tyr185=	Silent	2.64e-06	1	0.0246	0.0309	Passenger
KRD
A. Mutations in the selected cancer cohort
1	p.Ile456Ser	Missense	2.75e-07	1	0.000121	0.00054	Potential driver
2	p.Gly1108Trp	Missense	6.04e-07	1	0.000266	0.00054	Potential driver
3	p.Gly692Val	Missense	6.35e-07	1	0.00028	0.00054	Potential driver
4	p.Thr89=	Silent	8.16e-07	1	0.00036	0.00054	Potential driver
5	p.Arg1051Gln	Missense	1.81e-06	1	0.0008	0.00096	Potential driver
6	p.Thr677Met	Missense	2.64e-06	1	0.00116	0.00116	Potential driver
B. All genome wide-studies in ICGC
1	p.Ser1100Phe	Missense	6.94e-07	4	7.65e-11	1.83e-08	Driver
2	p.Arg1032Gln	Missense	1.52e-06	4	1.76e-09	2.11e-07	Driver
3	p.Arg54=	Silent	8.45e-07	3	8.45e-08	6.73e-06	Driver
4	p.Ala45Gly	Missense	2.01e-07	2	1.81e-06	0.000108	Driver
5	p.Ala973Ser	Missense	3.62e-07	2	5.85e-06	0.00028	Driver
6	p.Ala163Glu	Missense	4.04e-07	2	7.26e-06	0.000289	Driver
7	p.Gly296Val	Missense	5.35e-07	2	1.27e-05	0.000434	Driver
8	p.Val1234Met	Missense	6.11e-07	2	1.66e-05	0.000465	Driver
9	p.Pro1253Leu	Missense	6.6e-07	2	1.94e-05	0.000465	Driver
10	p.Gly509Glu	Missense	6.94e-07	2	2.14e-05	0.000465	Driver
11	p.Glu759Lys	Missense	6.94e-07	2	2.14e-05	0.000465	Driver
12	p.Ile43Thr	Missense	7.58e-07	2	2.55e-05	0.000474	Driver
13	p.Leu355=	Silent	8.16e-07	2	2.96e-05	0.000474	Driver
14	p.Gly1015Asp	Missense	8.17e-07	2	2.96e-05	0.000474	Driver
15	p.Phe258=	Silent	8.45e-07	2	3.17e-05	0.000474	Driver
16	p.Glu390Lys	Missense	8.45e-07	2	3.17e-05	0.000474	Driver
17	p.Arg1066Cys	Missense	1.52e-06	2	0.000102	0.00144	Potential driver
18	p.Ile698=	Silent	1.59e-06	2	0.000111	0.00148	Potential driver
19	p.Ala757=	Silent	1.67e-06	2	0.000123	0.00151	Potential driver
20	p.Ala352Val	Missense	1.75e-06	2	0.000135	0.00151	Potential driver
21	p.Arg1022*	Nonsense	1.75e-06	2	0.000135	0.00151	Potential driver
22	p.Arg720Gln	Missense	1.81e-06	2	0.000145	0.00151	Potential driver
23	p.Arg791Gln	Missense	1.81e-06	2	0.000145	0.00151	Potential driver
24	p.Arg347His	Missense	2.64e-06	2	0.000306	0.00293	Potential driver
25	p.Arg1032*	Nonsense	2.64e-06	2	0.000306	0.00293	Potential driver
26	p.Ala521=	Silent	2.77e-06	2	0.000338	0.00299	Potential driver
27	p.Ser1037=	Silent	2.77e-06	2	0.000338	0.00299	Potential driver
28	p.Leu151=	Silent	2.89e-06	2	0.000367	0.00313	Potential driver
29	p.Leu591Arg	Missense	1.12e-07	1	0.00106	0.00873	Potential driver
30	p.Val1042Gly	Missense	1.46e-07	1	0.00138	0.011	Potential driver
31	p.Gly438Arg	Missense	2.47e-07	1	0.00233	0.0121	Potential driver
32	p.Leu1049Trp	Missense	2.5e-07	1	0.00236	0.0121	Potential driver
33	p.Leu634*	Nonsense	2.55e-07	1	0.00241	0.0121	Potential driver
34	p.Leu1140Gln	Missense	2.55e-07	1	0.00241	0.0121	Potential driver
35	p.Leu1269Gln	Missense	2.55e-07	1	0.00241	0.0121	Potential driver
36	p.Met1016Lys	Missense	2.63e-07	1	0.00248	0.0121	Potential driver
37	p.Leu161Arg	Missense	2.71e-07	1	0.00256	0.0121	Potential driver
38	p.Ile456Ser	Missense	2.75e-07	1	0.0026	0.0121	Potential driver
39	p.Val1249Glu	Missense	3.07e-07	1	0.00289	0.0121	Potential driver
40	p.Asn693Tyr	Missense	3.11e-07	1	0.00294	0.0121	Potential driver
41	p.Glu759Val	Missense	3.11e-07	1	0.00294	0.0121	Potential driver
42	p.Asn762Tyr	Missense	3.11e-07	1	0.00294	0.0121	Potential driver
43	p.Pro32Thr	Missense	3.39e-07	1	0.0032	0.0121	Potential driver
44	p.Asn897Ile	Missense	3.44e-07	1	0.00325	0.0121	Potential driver
45	p.Ile955Phe	Missense	3.44e-07	1	0.00325	0.0121	Potential driver
46	p.Gln556His	Missense	3.53e-07	1	0.00333	0.0121	Potential driver
47	p.Ile456Met	Missense	3.57e-07	1	0.00337	0.0121	Potential driver
48	p.Pro992Ala	Missense	3.57e-07	1	0.00337	0.0121	Potential driver
49	p.Pro1355Ala	Missense	3.57e-07	1	0.00337	0.0121	Potential driver
50	p.Ala1103Asp	Missense	3.62e-07	1	0.00342	0.0121	Potential driver
51	p.Thr376Ala	Missense	3.74e-07	1	0.00353	0.0121	Passenger
52	p.Gly800Arg	Missense	3.79e-07	1	0.00358	0.0121	Passenger
53	p.Glu207Gly	Missense	3.8e-07	1	0.00359	0.0121	Passenger
54	p.Ala352Ser	Missense	4.04e-07	1	0.00381	0.0121	Passenger
55	p.Ala775Ser	Missense	4.04e-07	1	0.00381	0.0121	Passenger
56	p.His232Gln	Missense	4.78e-07	1	0.00451	0.0121	Passenger
57	p.Lys203Thr	Missense	5.03e-07	1	0.00475	0.0121	Passenger
58	p.Asn622=	Silent	5.28e-07	1	0.00497	0.0121	Passenger
59	p.Met1285Thr	Missense	5.28e-07	1	0.00497	0.0121	Passenger
60	p.Gln67=	Silent	5.28e-07	1	0.00498	0.0121	Passenger
61	p.Leu157Phe	Missense	5.28e-07	1	0.00498	0.0121	Passenger
62	p.Asp832Asn	Missense	5.28e-07	1	0.00498	0.0121	Passenger
63	p.Leu959Val	Missense	5.28e-07	1	0.00498	0.0121	Passenger
64	p.Asp1056Asn	Missense	5.28e-07	1	0.00498	0.0121	Passenger
65	p.Ser1104Phe	Missense	5.28e-07	1	0.00498	0.0121	Passenger
66	p.Arg1124Lys	Missense	5.28e-07	1	0.00498	0.0121	Passenger
67	p.Gln1149=	Silent	5.28e-07	1	0.00498	0.0121	Passenger
68	p.Val474Phe	Missense	5.41e-07	1	0.0051	0.0121	Passenger
69	p.Thr864Lys	Missense	5.41e-07	1	0.0051	0.0121	Passenger
70	p.Thr1339Lys	Missense	5.41e-07	1	0.0051	0.0121	Passenger
71	p.Leu517Ile	Missense	5.56e-07	1	0.00524	0.0121	Passenger
72	p.Arg863Met	Missense	5.56e-07	1	0.00524	0.0121	Passenger
73	p.Gly948Trp	Missense	5.56e-07	1	0.00524	0.0121	Passenger
74	p.Arg647Lys	Missense	5.62e-07	1	0.0053	0.0121	Passenger
75	p.Leu901Phe	Missense	5.62e-07	1	0.0053	0.0121	Passenger
76	p.Glu1204=	Silent	5.62e-07	1	0.0053	0.0121	Passenger
77	p.Ser229Asn	Missense	5.73e-07	1	0.0054	0.0121	Passenger
78	p.Asp257=	Silent	5.73e-07	1	0.0054	0.0121	Passenger
79	p.Val1012Met	Missense	5.73e-07	1	0.0054	0.0121	Passenger
80	p.Lys997Glu	Missense	5.77e-07	1	0.00544	0.0121	Passenger
81	p.Leu1244Phe	Missense	5.78e-07	1	0.00545	0.0121	Passenger
82	p.Gly296Asp	Missense	5.83e-07	1	0.00549	0.0121	Passenger
83	p.Ala874Thr	Missense	5.83e-07	1	0.00549	0.0121	Passenger
84	p.Ser1231Asn	Missense	5.83e-07	1	0.00549	0.0121	Passenger
85	p.Ser1338Asn	Missense	5.83e-07	1	0.00549	0.0121	Passenger
86	p.Lys378Asn	Missense	5.86e-07	1	0.00552	0.0121	Passenger
87	p.Asp39Tyr	Missense	5.91e-07	1	0.00557	0.0121	Passenger
88	p.Ser281Tyr	Missense	5.91e-07	1	0.00557	0.0121	Passenger
89	p.Ser338Tyr	Missense	5.91e-07	1	0.00557	0.0121	Passenger
90	p.Ser691Tyr	Missense	5.91e-07	1	0.00557	0.0121	Passenger
91	p.Glu1121*	Nonsense	5.91e-07	1	0.00557	0.0121	Passenger
92	p.Asp1254Tyr	Missense	5.91e-07	1	0.00557	0.0121	Passenger
93	p.Gly424Cys	Missense	6.04e-07	1	0.00569	0.0121	Passenger
94	p.Pro808Gln	Missense	6.04e-07	1	0.00569	0.0121	Passenger
95	p.Gly1108Trp	Missense	6.04e-07	1	0.00569	0.0121	Passenger
96	p.Val1093Ile	Missense	6.11e-07	1	0.00576	0.0121	Passenger
97	p.Asn693=	Silent	6.35e-07	1	0.00598	0.0121	Passenger
98	p.Gly380Trp	Missense	6.35e-07	1	0.00598	0.0121	Passenger
99	p.Gly692Val	Missense	6.35e-07	1	0.00598	0.0121	Passenger
100	p.Gly948Val	Missense	6.35e-07	1	0.00598	0.0121	Passenger
101	p.Glu1268Gly	Missense	6.45e-07	1	0.00608	0.0121	Passenger
102	p.Asp717Tyr	Missense	6.57e-07	1	0.00619	0.0121	Passenger
103	p.Ser1200Tyr	Missense	6.57e-07	1	0.00619	0.0121	Passenger
104	p.Glu1323*	Nonsense	6.57e-07	1	0.00619	0.0121	Passenger
105	p.His325Tyr	Missense	6.6e-07	1	0.00622	0.0121	Passenger
106	p.His1213Tyr	Missense	6.6e-07	1	0.00622	0.0121	Passenger
107	p.Pro1280Leu	Missense	6.6e-07	1	0.00622	0.0121	Passenger
108	p.Val398Ala	Missense	6.67e-07	1	0.00628	0.0121	Passenger
109	p.Ser803Pro	Missense	6.67e-07	1	0.00628	0.0121	Passenger
110	p.Asp1315Gly	Missense	6.67e-07	1	0.00628	0.0121	Passenger
111	p.Glu1114Asp	Missense	6.86e-07	1	0.00646	0.0121	Passenger
112	p.Asp58Asn	Missense	6.94e-07	1	0.00653	0.0121	Passenger
113	p.Asp180Asn	Missense	6.94e-07	1	0.00653	0.0121	Passenger
114	p.Glu261Lys	Missense	6.94e-07	1	0.00653	0.0121	Passenger
115	p.Gly394Glu	Missense	6.94e-07	1	0.00653	0.0121	Passenger
116	p.Glu464Lys	Missense	6.94e-07	1	0.00653	0.0121	Passenger
117	p.Ser544Phe	Missense	6.94e-07	1	0.00653	0.0121	Passenger
118	p.Phe545=	Silent	6.94e-07	1	0.00653	0.0121	Passenger
119	p.Phe945=	Silent	6.94e-07	1	0.00653	0.0121	Passenger
120	p.Asp998Asn	Missense	6.94e-07	1	0.00653	0.0121	Passenger
121	p.Asp1052Asn	Missense	6.94e-07	1	0.00653	0.0121	Passenger
122	p.Gly1063Glu	Missense	6.94e-07	1	0.00653	0.0121	Passenger
123	p.Asp1189Asn	Missense	6.94e-07	1	0.00653	0.0121	Passenger
124	p.Gly1333Glu	Missense	6.94e-07	1	0.00653	0.0121	Passenger
125	p.Cys737Tyr	Missense	7.12e-07	1	0.0067	0.0121	Passenger
126	p.Ala775Thr	Missense	7.12e-07	1	0.0067	0.0121	Passenger
127	p.Ala1168Thr	Missense	7.12e-07	1	0.0067	0.0121	Passenger
128	p.Pro351Ser	Missense	7.33e-07	1	0.00691	0.0121	Passenger
129	p.Gly942Glu	Missense	7.33e-07	1	0.00691	0.0121	Passenger
130	p.Pro956Ser	Missense	7.33e-07	1	0.00691	0.0121	Passenger
131	p.Pro1210Ser	Missense	7.33e-07	1	0.00691	0.0121	Passenger
132	p.Pro1243Ser	Missense	7.33e-07	1	0.00691	0.0121	Passenger
133	p.Lys981Asn	Missense	7.37e-07	1	0.00694	0.0121	Passenger
134	p.Tyr1319*	Nonsense	7.37e-07	1	0.00694	0.0121	Passenger
135	p.Pro551=	Silent	7.44e-07	1	0.00701	0.0121	Passenger
136	p.Pro1057=	Silent	7.44e-07	1	0.00701	0.0121	Passenger
137	p.Ser1154=	Silent	7.44e-07	1	0.00701	0.0121	Passenger
138	p.Thr1217=	Silent	7.44e-07	1	0.00701	0.0121	Passenger
139	p.Ile1111Thr	Missense	7.58e-07	1	0.00714	0.0123	Passenger
140	p.Glu240Asp	Missense	8.12e-07	1	0.00764	0.0125	Passenger
141	p.His891Tyr	Missense	8.45e-07	1	0.00796	0.0125	Passenger
142	p.Ser972Leu	Missense	8.45e-07	1	0.00796	0.0125	Passenger
143	p.Tyr354*	Nonsense	8.61e-07	1	0.0081	0.0127	Passenger
144	p.Gly394Arg	Missense	9.41e-07	1	0.00885	0.0136	Passenger
145	p.Gly509Arg	Missense	9.41e-07	1	0.00885	0.0136	Passenger
146	p.Gly539Arg	Missense	9.41e-07	1	0.00885	0.0136	Passenger
147	p.Gly509=	Silent	9.49e-07	1	0.00893	0.0136	Passenger
148	p.Val216Ala	Missense	1.01e-06	1	0.0095	0.0142	Passenger
149	p.Val238Ala	Missense	1.01e-06	1	0.0095	0.0142	Passenger
150	p.Val1042Ala	Missense	1.01e-06	1	0.0095	0.0142	Passenger
151	p.Lys1120=	Silent	1.02e-06	1	0.00954	0.0142	Passenger
152	p.Gly345Arg	Missense	1.03e-06	1	0.0097	0.0142	Passenger
153	p.Gly493Arg	Missense	1.03e-06	1	0.0097	0.0142	Passenger
154	p.Ser1154*	Nonsense	1.06e-06	1	0.00993	0.0144	Passenger
155	p.Leu1184Phe	Missense	1.06e-06	1	0.00993	0.0144	Passenger
156	p.Lys630Asn	Missense	1.12e-06	1	0.0105	0.0151	Passenger
157	p.Lys1230Asn	Missense	1.12e-06	1	0.0105	0.0151	Passenger
158	p.Ala505=	Silent	1.17e-06	1	0.011	0.0154	Passenger
159	p.Pro590=	Silent	1.17e-06	1	0.011	0.0154	Passenger
160	p.Ala881=	Silent	1.17e-06	1	0.011	0.0154	Passenger
161	p.Leu1272=	Silent	1.18e-06	1	0.0111	0.0155	Passenger
162	p.Gly733=	Silent	1.29e-06	1	0.0122	0.0169	Passenger
163	p.Ile399=	Silent	1.35e-06	1	0.0127	0.0171	Passenger
164	p.Ile519=	Silent	1.35e-06	1	0.0127	0.0171	Passenger
165	p.Ile1034=	Silent	1.35e-06	1	0.0127	0.0171	Passenger
166	p.Ile1252=	Silent	1.35e-06	1	0.0127	0.0171	Passenger
167	p.Trp610*	Nonsense	1.35e-06	1	0.0127	0.0171	Passenger
168	p.Trp1071*	Nonsense	1.35e-06	1	0.0127	0.0171	Passenger
169	p.Thr315=	Silent	1.46e-06	1	0.0137	0.0174	Passenger
170	p.Pro403=	Silent	1.46e-06	1	0.0137	0.0174	Passenger
171	p.Val412=	Silent	1.46e-06	1	0.0137	0.0174	Passenger
172	p.Pro599=	Silent	1.46e-06	1	0.0137	0.0174	Passenger
173	p.Met627Ile	Missense	1.46e-06	1	0.0137	0.0174	Passenger
174	p.Val978=	Silent	1.46e-06	1	0.0137	0.0174	Passenger
175	p.Trp63*	Nonsense	1.48e-06	1	0.0139	0.0174	Passenger
176	p.Ala844=	Silent	1.5e-06	1	0.0141	0.0174	Passenger
177	p.Ser1100=	Silent	1.5e-06	1	0.0141	0.0174	Passenger
178	p.Asp81Asn	Missense	1.52e-06	1	0.0143	0.0174	Passenger
179	p.Ser112Leu	Missense	1.52e-06	1	0.0143	0.0174	Passenger
180	p.Glu469Lys	Missense	1.52e-06	1	0.0143	0.0174	Passenger
181	p.Glu685Lys	Missense	1.52e-06	1	0.0143	0.0174	Passenger
182	p.Arg880*	Nonsense	1.52e-06	1	0.0143	0.0174	Passenger
183	p.Arg944Gln	Missense	1.52e-06	1	0.0143	0.0174	Passenger
184	p.Arg1022Gln	Missense	1.52e-06	1	0.0143	0.0174	Passenger
185	p.Ser1037Leu	Missense	1.52e-06	1	0.0143	0.0174	Passenger
186	p.Arg1229Gln	Missense	1.52e-06	1	0.0143	0.0174	Passenger
187	p.Gly345=	Silent	1.67e-06	1	0.0156	0.0189	Passenger
188	p.Gly942=	Silent	1.67e-06	1	0.0156	0.0189	Passenger
189	p.Ser80=	Silent	1.75e-06	1	0.0164	0.0193	Passenger
190	p.Arg347Cys	Missense	1.75e-06	1	0.0164	0.0193	Passenger
191	p.Ala772Val	Missense	1.75e-06	1	0.0164	0.0193	Passenger
192	p.Arg1229*	Nonsense	1.75e-06	1	0.0164	0.0193	Passenger
193	p.Leu591=	Silent	1.8e-06	1	0.0168	0.0193	Passenger
194	p.Arg18Trp	Missense	1.81e-06	1	0.017	0.0193	Passenger
195	p.Pro230Leu	Missense	1.81e-06	1	0.017	0.0193	Passenger
196	p.Arg720Trp	Missense	1.81e-06	1	0.017	0.0193	Passenger
197	p.Arg725Cys	Missense	1.81e-06	1	0.017	0.0193	Passenger
198	p.Arg787Gln	Missense	1.81e-06	1	0.017	0.0193	Passenger
199	p.Arg833Gln	Missense	1.81e-06	1	0.017	0.0193	Passenger
200	p.Arg833Trp	Missense	1.81e-06	1	0.017	0.0193	Passenger
201	p.Arg1051Gln	Missense	1.81e-06	1	0.017	0.0193	Passenger
202	p.Val93=	Silent	1.9e-06	1	0.0178	0.0199	Passenger
203	p.Leu882=	Silent	1.9e-06	1	0.0178	0.0199	Passenger
204	p.Val899=	Silent	1.9e-06	1	0.0178	0.0199	Passenger
205	p.Leu1095=	Silent	2.04e-06	1	0.0191	0.0212	Passenger
206	p.Arg1051=	Silent	2.38e-06	1	0.0222	0.0246	Passenger
207	p.Leu228=	Silent	2.43e-06	1	0.0227	0.025	Passenger
208	p.Leu1269=	Silent	2.48e-06	1	0.0232	0.0253	Passenger
209	p.Ile804=	Silent	2.51e-06	1	0.0235	0.0253	Passenger
210	p.Thr442=	Silent	2.52e-06	1	0.0236	0.0253	Passenger
211	p.Ser1021=	Silent	2.52e-06	1	0.0236	0.0253	Passenger
212	p.Val15Met	Missense	2.64e-06	1	0.0246	0.0253	Passenger
213	p.Val218Ile	Missense	2.64e-06	1	0.0246	0.0253	Passenger
214	p.Asn468=	Silent	2.64e-06	1	0.0246	0.0253	Passenger
215	p.Thr668Met	Missense	2.64e-06	1	0.0246	0.0253	Passenger
216	p.Thr677Met	Missense	2.64e-06	1	0.0246	0.0253	Passenger
217	p.Thr689Met	Missense	2.64e-06	1	0.0246	0.0253	Passenger
218	p.Asp731=	Silent	2.64e-06	1	0.0246	0.0253	Passenger
219	p.Arg787Trp	Missense	2.64e-06	1	0.0246	0.0253	Passenger
220	p.Arg944*	Nonsense	2.64e-06	1	0.0246	0.0253	Passenger
221	p.Arg946His	Missense	2.64e-06	1	0.0246	0.0253	Passenger
222	p.Arg961Trp	Missense	2.64e-06	1	0.0246	0.0253	Passenger
223	p.Val1041Met	Missense	2.64e-06	1	0.0246	0.0253	Passenger
224	p.Ala772=	Silent	2.77e-06	1	0.0259	0.0263	Passenger
225	p.Ser1311=	Silent	2.77e-06	1	0.0259	0.0263	Passenger
226	p.Ala352=	Silent	2.89e-06	1	0.027	0.027	Passenger
227	p.Val536=	Silent	2.89e-06	1	0.027	0.027	Passenger
228	p.Thr668=	Silent	2.89e-06	1	0.027	0.027	Passenger
229	p.Thr761=	Silent	2.89e-06	1	0.027	0.027	Passenger
C. All samples in COSMIC
1	p.Ser1100Phe	Missense	6.94e-07	4	7.65e-11	2.57e-08	Driver
2	p.Arg1032Gln	Missense	1.52e-06	4	1.76e-09	2.96e-07	Driver
3	p.Arg54=	Silent	8.45e-07	3	8.45e-08	9.46e-06	Driver
4	p.Ala45Gly	Missense	2.01e-07	2	1.81e-06	0.000152	Driver
5	p.Ala973Ser	Missense	3.62e-07	2	5.85e-06	0.000393	Driver
6	p.Ala163Glu	Missense	4.04e-07	2	7.26e-06	0.000407	Driver
7	p.Gly296Val	Missense	5.35e-07	2	1.27e-05	0.00061	Driver
8	p.Val1234Met	Missense	6.11e-07	2	1.66e-05	0.000654	Driver
9	p.Pro1253Leu	Missense	6.6e-07	2	1.94e-05	0.000654	Driver
10	p.Gly509Glu	Missense	6.94e-07	2	2.14e-05	0.000654	Driver
11	p.Ser1100Phe	Missense	6.94e-07	4	7.65e-11	2.57e-08	Driver
12	p.Arg1032Gln	Missense	1.52e-06	4	1.76e-09	2.96e-07	Driver
13	p.Arg54=	Silent	8.45e-07	3	8.45e-08	9.46e-06	Driver
14	p.Ala45Gly	Missense	2.01e-07	2	1.81e-06	0.000152	Driver
15	p.Ala973Ser	Missense	3.62e-07	2	5.85e-06	0.000393	Driver
16	p.Ala163Glu	Missense	4.04e-07	2	7.26e-06	0.000407	Driver
17	p.Gly296Val	Missense	5.35e-07	2	1.27e-05	0.00061	Driver
18	p.Val1234Met	Missense	6.11e-07	2	1.66e-05	0.000654	Driver
19	p.Pro1253Leu	Missense	6.6e-07	2	1.94e-05	0.000654	Driver
20	p.Gly509Glu	Missense	6.94e-07	2	2.14e-05	0.000654	Driver
21	p.Glu759Lys	Missense	6.94e-07	2	2.14e-05	0.000654	Driver
22	p.Ile43Thr	Missense	7.58e-07	2	2.55e-05	0.000667	Driver
23	p.Leu355=	Silent	8.16e-07	2	2.96e-05	0.000667	Driver
24	p.Gly1015Asp	Missense	8.17e-07	2	2.96e-05	0.000667	Driver
25	p.Phe258=	Silent	8.45e-07	2	3.17e-05	0.000667	Driver
26	p.Glu390Lys	Missense	8.45e-07	2	3.17e-05	0.000667	Driver
27	p.Arg1066Cys	Missense	1.52e-06	2	0.000102	0.00203	Potential driver
28	p.Ile698=	Silent	1.59e-06	2	0.000111	0.00208	Potential driver
29	p.Ala757=	Silent	1.67e-06	2	0.000123	0.00212	Potential driver
30	p.Ala352Val	Missense	1.75e-06	2	0.000135	0.00212	Potential driver
31	p.Arg1022*	Nonsense	1.75e-06	2	0.000135	0.00212	Potential driver
32	p.Arg720Gln	Missense	1.81e-06	2	0.000145	0.00212	Potential driver
33	p.Arg791Gln	Missense	1.81e-06	2	0.000145	0.00212	Potential driver
34	p.Arg347His	Missense	2.64e-06	2	0.000306	0.00411	Potential driver
35	p.Arg1032*	Nonsense	2.64e-06	2	0.000306	0.00411	Potential driver
36	p.Ala521=	Silent	2.77e-06	2	0.000338	0.0042	Potential driver
37	p.Ser1037=	Silent	2.77e-06	2	0.000338	0.0042	Potential driver
38	p.Leu151=	Silent	2.89e-06	2	0.000367	0.0044	Potential driver
39	p.Leu591Arg	Missense	1.12e-07	1	0.00106	0.0123	Potential driver
40	p.Val1042Gly	Missense	1.46e-07	1	0.00138	0.0154	Potential driver
41	p.Gly438Arg	Missense	2.47e-07	1	0.00233	0.0171	Potential driver
42	p.Leu1049Trp	Missense	2.5e-07	1	0.00236	0.0171	Potential driver
43	p.Leu634*	Nonsense	2.55e-07	1	0.00241	0.0171	Potential driver
44	p.Leu1140Gln	Missense	2.55e-07	1	0.00241	0.0171	Potential driver
45	p.Leu1269Gln	Missense	2.55e-07	1	0.00241	0.0171	Potential driver
46	p.Met1016Lys	Missense	2.63e-07	1	0.00248	0.0171	Potential driver
47	p.Leu161Arg	Missense	2.71e-07	1	0.00256	0.0171	Potential driver
48	p.Ile456Ser	Missense	2.75e-07	1	0.0026	0.0171	Potential driver
49	p.Val1249Glu	Missense	3.07e-07	1	0.00289	0.0171	Potential driver
50	p.Asn693Tyr	Missense	3.11e-07	1	0.00294	0.0171	Potential driver
51	p.Glu759Val	Missense	3.11e-07	1	0.00294	0.0171	Potential driver
52	p.Asn762Tyr	Missense	3.11e-07	1	0.00294	0.0171	Potential driver
53	p.Pro32Thr	Missense	3.39e-07	1	0.0032	0.0171	Potential driver
54	p.Asn897Ile	Missense	3.44e-07	1	0.00325	0.0171	Potential driver
55	p.Ile955Phe	Missense	3.44e-07	1	0.00325	0.0171	Potential driver
56	p.Gln556His	Missense	3.53e-07	1	0.00333	0.0171	Potential driver
57	p.Ile456Met	Missense	3.57e-07	1	0.00337	0.0171	Potential driver
58	p.Pro992Ala	Missense	3.57e-07	1	0.00337	0.0171	Potential driver
59	p.Pro1355Ala	Missense	3.57e-07	1	0.00337	0.0171	Potential driver
60	p.Ala1103Asp	Missense	3.62e-07	1	0.00342	0.0171	Potential driver
61	p.Thr376Ala	Missense	3.74e-07	1	0.00353	0.0171	Passenger
62	p.Gly800Arg	Missense	3.79e-07	1	0.00358	0.0171	Passenger
63	p.Glu207Gly	Missense	3.8e-07	1	0.00359	0.0171	Passenger
64	p.Ala352Ser	Missense	4.04e-07	1	0.00381	0.0171	Passenger
65	p.Ala775Ser	Missense	4.04e-07	1	0.00381	0.0171	Passenger
66	p.His232Gln	Missense	4.78e-07	1	0.00451	0.0171	Passenger
67	p.Lys203Thr	Missense	5.03e-07	1	0.00475	0.0171	Passenger
68	p.Asn622=	Silent	5.28e-07	1	0.00497	0.0171	Passenger
69	p.Met1285Thr	Missense	5.28e-07	1	0.00497	0.0171	Passenger
70	p.Gln67=	Silent	5.28e-07	1	0.00498	0.0171	Passenger
71	p.Leu157Phe	Missense	5.28e-07	1	0.00498	0.0171	Passenger
72	p.Asp832Asn	Missense	5.28e-07	1	0.00498	0.0171	Passenger
73	p.Leu959Val	Missense	5.28e-07	1	0.00498	0.0171	Passenger
74	p.Asp1056Asn	Missense	5.28e-07	1	0.00498	0.0171	Passenger
75	p.Ser1104Phe	Missense	5.28e-07	1	0.00498	0.0171	Passenger
76	p.Arg1124Lys	Missense	5.28e-07	1	0.00498	0.0171	Passenger
77	p.Gln1149=	Silent	5.28e-07	1	0.00498	0.0171	Passenger
78	p.Val474Phe	Missense	5.41e-07	1	0.0051	0.0171	Passenger
79	p.Thr864Lys	Missense	5.41e-07	1	0.0051	0.0171	Passenger
80	p.Thr1339Lys	Missense	5.41e-07	1	0.0051	0.0171	Passenger
81	p.Leu517Ile	Missense	5.56e-07	1	0.00524	0.0171	Passenger
82	p.Arg863Met	Missense	5.56e-07	1	0.00524	0.0171	Passenger
83	p.Gly948Trp	Missense	5.56e-07	1	0.00524	0.0171	Passenger
84	p.Arg647Lys	Missense	5.62e-07	1	0.0053	0.0171	Passenger
85	p.Leu901Phe	Missense	5.62e-07	1	0.0053	0.0171	Passenger
86	p.Glu1204=	Silent	5.62e-07	1	0.0053	0.0171	Passenger
87	p.Ser229Asn	Missense	5.73e-07	1	0.0054	0.0171	Passenger
88	p.Asp257=	Silent	5.73e-07	1	0.0054	0.0171	Passenger
89	p.Val1012Met	Missense	5.73e-07	1	0.0054	0.0171	Passenger
90	p.Lys997Glu	Missense	5.77e-07	1	0.00544	0.0171	Passenger
91	p.Leu1244Phe	Missense	5.78e-07	1	0.00545	0.0171	Passenger
92	p.Gly296Asp	Missense	5.83e-07	1	0.00549	0.0171	Passenger
93	p.Ala874Thr	Missense	5.83e-07	1	0.00549	0.0171	Passenger
94	p.Ser1231Asn	Missense	5.83e-07	1	0.00549	0.0171	Passenger
95	p.Ser1338Asn	Missense	5.83e-07	1	0.00549	0.0171	Passenger
96	p.Lys378Asn	Missense	5.86e-07	1	0.00552	0.0171	Passenger
97	p.Asp39Tyr	Missense	5.91e-07	1	0.00557	0.0171	Passenger
98	p.Ser281Tyr	Missense	5.91e-07	1	0.00557	0.0171	Passenger
99	p.Ser338Tyr	Missense	5.91e-07	1	0.00557	0.0171	Passenger
100	p.Ser691Tyr	Missense	5.91e-07	1	0.00557	0.0171	Passenger
101	p.Glu1121*	Nonsense	5.91e-07	1	0.00557	0.0171	Passenger
102	p.Asp1254Tyr	Missense	5.91e-07	1	0.00557	0.0171	Passenger
103	p.Gly424Cys	Missense	6.04e-07	1	0.00569	0.0171	Passenger
104	p.Pro808Gln	Missense	6.04e-07	1	0.00569	0.0171	Passenger
105	p.Gly1108Trp	Missense	6.04e-07	1	0.00569	0.0171	Passenger
106	p.Val1093Ile	Missense	6.11e-07	1	0.00576	0.0171	Passenger
107	p.Asn693=	Silent	6.35e-07	1	0.00598	0.0171	Passenger
108	p.Gly380Trp	Missense	6.35e-07	1	0.00598	0.0171	Passenger
109	p.Gly692Val	Missense	6.35e-07	1	0.00598	0.0171	Passenger
110	p.Gly948Val	Missense	6.35e-07	1	0.00598	0.0171	Passenger
111	p.Glu1268Gly	Missense	6.45e-07	1	0.00608	0.0171	Passenger
112	p.Asp717Tyr	Missense	6.57e-07	1	0.00619	0.0171	Passenger
113	p.Ser1200Tyr	Missense	6.57e-07	1	0.00619	0.0171	Passenger
114	p.Glu1323*	Nonsense	6.57e-07	1	0.00619	0.0171	Passenger
115	p.His325Tyr	Missense	6.6e-07	1	0.00622	0.0171	Passenger
116	p.His1213Tyr	Missense	6.6e-07	1	0.00622	0.0171	Passenger
117	p.Pro1280Leu	Missense	6.6e-07	1	0.00622	0.0171	Passenger
118	p.Val398Ala	Missense	6.67e-07	1	0.00628	0.0171	Passenger
119	p.Ser803Pro	Missense	6.67e-07	1	0.00628	0.0171	Passenger
120	p.Asp1315Gly	Missense	6.67e-07	1	0.00628	0.0171	Passenger
121	p.Glu1114Asp	Missense	6.86e-07	1	0.00646	0.0171	Passenger
122	p.Asp58Asn	Missense	6.94e-07	1	0.00653	0.0171	Passenger
123	p.Asp180Asn	Missense	6.94e-07	1	0.00653	0.0171	Passenger
124	p.Glu261Lys	Missense	6.94e-07	1	0.00653	0.0171	Passenger
125	p.Gly394Glu	Missense	6.94e-07	1	0.00653	0.0171	Passenger
126	p.Glu464Lys	Missense	6.94e-07	1	0.00653	0.0171	Passenger
127	p.Ser544Phe	Missense	6.94e-07	1	0.00653	0.0171	Passenger
128	p.Phe545=	Silent	6.94e-07	1	0.00653	0.0171	Passenger
129	p.Phe945=	Silent	6.94e-07	1	0.00653	0.0171	Passenger
130	p.Asp998Asn	Missense	6.94e-07	1	0.00653	0.0171	Passenger
131	p.Asp1052Asn	Missense	6.94e-07	1	0.00653	0.0171	Passenger
132	p.Gly1063Glu	Missense	6.94e-07	1	0.00653	0.0171	Passenger
133	p.Asp1189Asn	Missense	6.94e-07	1	0.00653	0.0171	Passenger
134	p.Gly1333Glu	Missense	6.94e-07	1	0.00653	0.0171	Passenger
135	p.Cys737Tyr	Missense	7.12e-07	1	0.0067	0.0171	Passenger
136	p.Ala775Thr	Missense	7.12e-07	1	0.0067	0.0171	Passenger
137	p.Ala1168Thr	Missense	7.12e-07	1	0.0067	0.0171	Passenger
138	p.Pro351Ser	Missense	7.33e-07	1	0.00691	0.0171	Passenger
139	p.Gly942Glu	Missense	7.33e-07	1	0.00691	0.0171	Passenger
140	p.Pro956Ser	Missense	7.33e-07	1	0.00691	0.0171	Passenger
141	p.Pro1210Ser	Missense	7.33e-07	1	0.00691	0.0171	Passenger
142	p.Pro1243Ser	Missense	7.33e-07	1	0.00691	0.0171	Passenger
143	p.Lys981Asn	Missense	7.37e-07	1	0.00694	0.0171	Passenger
144	p.Tyr1319*	Nonsense	7.37e-07	1	0.00694	0.0171	Passenger
145	p.Pro551=	Silent	7.44e-07	1	0.00701	0.0171	Passenger
146	p.Pro1057=	Silent	7.44e-07	1	0.00701	0.0171	Passenger
147	p.Ser1154=	Silent	7.44e-07	1	0.00701	0.0171	Passenger
148	p.Thr1217=	Silent	7.44e-07	1	0.00701	0.0171	Passenger
149	p.Ile1111Thr	Missense	7.58e-07	1	0.00714	0.0173	Passenger
150	p.Glu240Asp	Missense	8.12e-07	1	0.00764	0.0176	Passenger
151	p.Lys1270Asn	Missense	8.12e-07	1	0.00764	0.0176	Passenger
152	p.Thr89=	Silent	8.16e-07	1	0.00768	0.0176	Passenger
153	p.Ala20Val	Missense	8.17e-07	1	0.00769	0.0176	Passenger
154	p.Pro592Ser	Missense	8.17e-07	1	0.00769	0.0176	Passenger
155	p.Ala690Thr	Missense	8.17e-07	1	0.00769	0.0176	Passenger
156	p.Ser1290Arg	Missense	8.29e-07	1	0.0078	0.0176	Passenger
157	p.Asp964Glu	Missense	8.44e-07	1	0.00794	0.0176	Passenger
158	p.Glu483Lys	Missense	8.45e-07	1	0.00796	0.0176	Passenger
159	p.Gln676*	Nonsense	8.45e-07	1	0.00796	0.0176	Passenger
160	p.Phe752=	Silent	8.45e-07	1	0.00796	0.0176	Passenger
161	p.His891Tyr	Missense	8.45e-07	1	0.00796	0.0176	Passenger
162	p.Ser972Leu	Missense	8.45e-07	1	0.00796	0.0176	Passenger
163	p.Tyr354*	Nonsense	8.61e-07	1	0.0081	0.0178	Passenger
164	p.Gly394Arg	Missense	9.41e-07	1	0.00885	0.0191	Passenger
165	p.Gly509Arg	Missense	9.41e-07	1	0.00885	0.0191	Passenger
166	p.Gly539Arg	Missense	9.41e-07	1	0.00885	0.0191	Passenger
167	p.Gly509=	Silent	9.49e-07	1	0.00893	0.0191	Passenger
168	p.Val216Ala	Missense	1.01e-06	1	0.0095	0.0199	Passenger
169	p.Val238Ala	Missense	1.01e-06	1	0.0095	0.0199	Passenger
170	p.Val1042Ala	Missense	1.01e-06	1	0.0095	0.0199	Passenger
171	p.Lys1120=	Silent	1.02e-06	1	0.00954	0.0199	Passenger
172	p.Gly345Arg	Missense	1.03e-06	1	0.0097	0.02	Passenger
173	p.Gly493Arg	Missense	1.03e-06	1	0.0097	0.02	Passenger
174	p.Ser1154*	Nonsense	1.06e-06	1	0.00993	0.0202	Passenger
175	p.Leu1184Phe	Missense	1.06e-06	1	0.00993	0.0202	Passenger
176	p.Lys630Asn	Missense	1.12e-06	1	0.0105	0.0212	Passenger
177	p.Lys1230Asn	Missense	1.12e-06	1	0.0105	0.0212	Passenger
178	p.Ala505=	Silent	1.17e-06	1	0.011	0.0217	Passenger
179	p.Pro590=	Silent	1.17e-06	1	0.011	0.0217	Passenger
180	p.Ala881=	Silent	1.17e-06	1	0.011	0.0217	Passenger
181	p.Leu1272=	Silent	1.18e-06	1	0.0111	0.0218	Passenger
182	p.Gly733=	Silent	1.29e-06	1	0.0122	0.0237	Passenger
183	p.Ile399=	Silent	1.35e-06	1	0.0127	0.024	Passenger
184	p.Ile519=	Silent	1.35e-06	1	0.0127	0.024	Passenger
185	p.Ile1034=	Silent	1.35e-06	1	0.0127	0.024	Passenger
186	p.Ile1252=	Silent	1.35e-06	1	0.0127	0.024	Passenger
187	p.Trp610*	Nonsense	1.35e-06	1	0.0127	0.024	Passenger
188	p.Trp1071*	Nonsense	1.35e-06	1	0.0127	0.024	Passenger
189	p.Thr315=	Silent	1.46e-06	1	0.0137	0.0245	Passenger
190	p.Pro403=	Silent	1.46e-06	1	0.0137	0.0245	Passenger
191	p.Val412=	Silent	1.46e-06	1	0.0137	0.0245	Passenger
192	p.Pro599=	Silent	1.46e-06	1	0.0137	0.0245	Passenger
193	p.Met627Ile	Missense	1.46e-06	1	0.0137	0.0245	Passenger
194	p.Val978=	Silent	1.46e-06	1	0.0137	0.0245	Passenger
195	p.Trp63*	Nonsense	1.48e-06	1	0.0139	0.0245	Passenger
196	p.Ala844=	Silent	1.5e-06	1	0.0141	0.0245	Passenger
197	p.Ser1100=	Silent	1.5e-06	1	0.0141	0.0245	Passenger
198	p.Asp81Asn	Missense	1.52e-06	1	0.0143	0.0245	Passenger
199	p.Ser112Leu	Missense	1.52e-06	1	0.0143	0.0245	Passenger
200	p.Glu469Lys	Missense	1.52e-06	1	0.0143	0.0245	Passenger
201	p.Glu685Lys	Missense	1.52e-06	1	0.0143	0.0245	Passenger
202	p.Arg880*	Nonsense	1.52e-06	1	0.0143	0.0245	Passenger
203	p.Arg944Gln	Missense	1.52e-06	1	0.0143	0.0245	Passenger
204	p.Arg1022Gln	Missense	1.52e-06	1	0.0143	0.0245	Passenger
205	p.Ser1037Leu	Missense	1.52e-06	1	0.0143	0.0245	Passenger
206	p.Arg1229Gln	Missense	1.52e-06	1	0.0143	0.0245	Passenger
207	p.Gly345=	Silent	1.67e-06	1	0.0156	0.0265	Passenger
208	p.Gly942=	Silent	1.67e-06	1	0.0156	0.0265	Passenger
209	p.Ser80=	Silent	1.75e-06	1	0.0164	0.0271	Passenger
210	p.Arg347Cys	Missense	1.75e-06	1	0.0164	0.0271	Passenger
211	p.Ala772Val	Missense	1.75e-06	1	0.0164	0.0271	Passenger
212	p.Arg1229*	Nonsense	1.75e-06	1	0.0164	0.0271	Passenger
213	p.Leu591=	Silent	1.8e-06	1	0.0168	0.0271	Passenger
214	p.Arg18Trp	Missense	1.81e-06	1	0.017	0.0271	Passenger
215	p.Pro230Leu	Missense	1.81e-06	1	0.017	0.0271	Passenger
216	p.Arg720Trp	Missense	1.81e-06	1	0.017	0.0271	Passenger
217	p.Arg725Cys	Missense	1.81e-06	1	0.017	0.0271	Passenger
218	p.Arg787Gln	Missense	1.81e-06	1	0.017	0.0271	Passenger
219	p.Arg833Gln	Missense	1.81e-06	1	0.017	0.0271	Passenger
220	p.Arg833Trp	Missense	1.81e-06	1	0.017	0.0271	Passenger
221	p.Arg1051Gln	Missense	1.81e-06	1	0.017	0.0271	Passenger
222	p.Val93=	Silent	1.9e-06	1	0.0178	0.028	Passenger
223	p.Leu882=	Silent	1.9e-06	1	0.0178	0.028	Passenger
224	p.Val899=	Silent	1.9e-06	1	0.0178	0.028	Passenger
225	p.Leu1095=	Silent	2.04e-06	1	0.0191	0.0298	Passenger
226	p.Arg1051=	Silent	2.38e-06	1	0.0222	0.0346	Passenger
227	p.Leu228=	Silent	2.43e-06	1	0.0227	0.0351	Passenger
228	p.Leu1269=	Silent	2.48e-06	1	0.0232	0.0355	Passenger
229	p.Ile804=	Silent	2.51e-06	1	0.0235	0.0355	Passenger
230	p.Thr442=	Silent	2.52e-06	1	0.0236	0.0355	Passenger
231	p.Ser1021=	Silent	2.52e-06	1	0.0236	0.0355	Passenger
232	p.Val15Met	Missense	2.64e-06	1	0.0246	0.0355	Passenger
233	p.Val218Ile	Missense	2.64e-06	1	0.0246	0.0355	Passenger
234	p.Asn468=	Silent	2.64e-06	1	0.0246	0.0355	Passenger
235	p.Thr668Met	Missense	2.64e-06	1	0.0246	0.0355	Passenger
236	p.Thr677Met	Missense	2.64e-06	1	0.0246	0.0355	Passenger
237	p.Thr689Met	Missense	2.64e-06	1	0.0246	0.0355	Passenger
238	p.Asp731=	Silent	2.64e-06	1	0.0246	0.0355	Passenger
239	p.Arg787Trp	Missense	2.64e-06	1	0.0246	0.0355	Passenger
240	p.Arg944*	Nonsense	2.64e-06	1	0.0246	0.0355	Passenger
241	p.Arg946His	Missense	2.64e-06	1	0.0246	0.0355	Passenger
242	p.Arg961Trp	Missense	2.64e-06	1	0.0246	0.0355	Passenger
243	p.Val1041Met	Missense	2.64e-06	1	0.0246	0.0355	Passenger
244	p.Ala772=	Silent	2.77e-06	1	0.0259	0.037	Passenger
245	p.Ser1311=	Silent	2.77e-06	1	0.0259	0.037	Passenger
246	p.Ala352=	Silent	2.89e-06	1	0.027	0.0379	Passenger
247	p.Val536=	Silent	2.89e-06	1	0.027	0.0379	Passenger
248	p.Thr668=	Silent	2.89e-06	1	0.027	0.0379	Passenger
249	p.Thr761=	Silent	2.89e-06	1	0.027	0.0379	Passenger
